# Supplementary material
Source: PubMed Central journal article supplement (PMC3760174)

Type of file: figure

Label: Sup Fig 1a

Filename: Fig1\_A.pdf

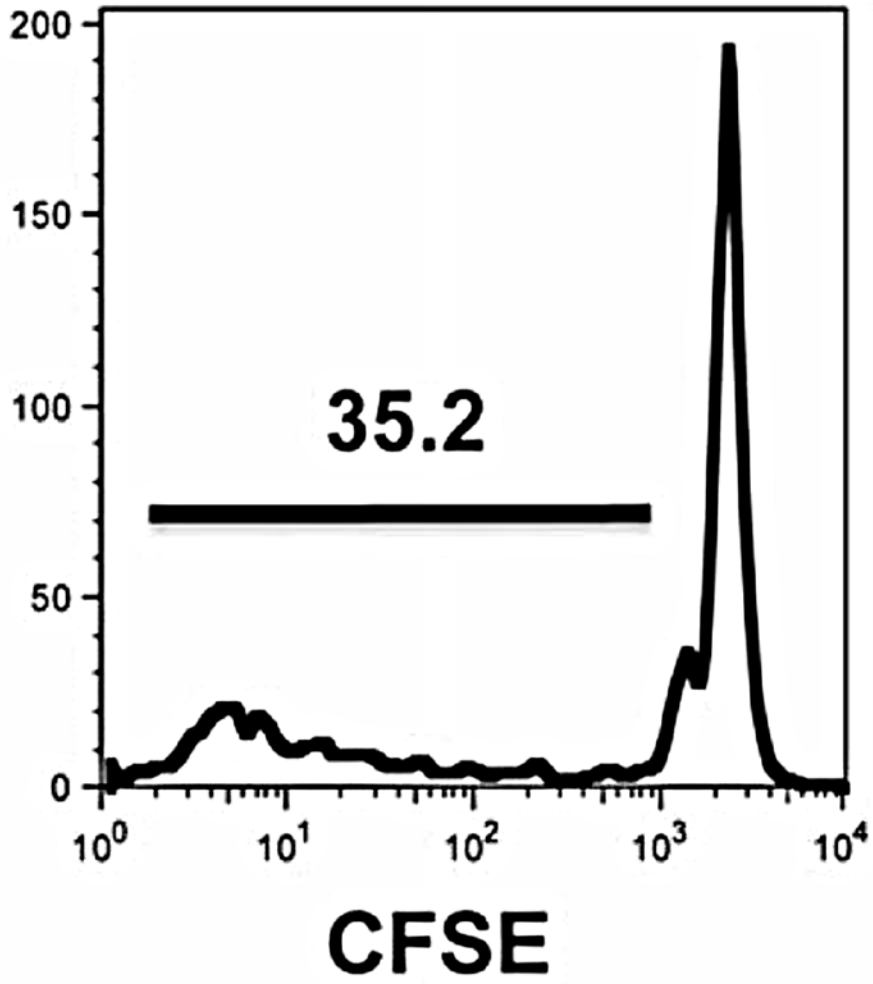

Type of file: figure

Label: Sup Fig 1b

Filename: Fig1\_B.pdf

# Isotype Control

**PNAd**

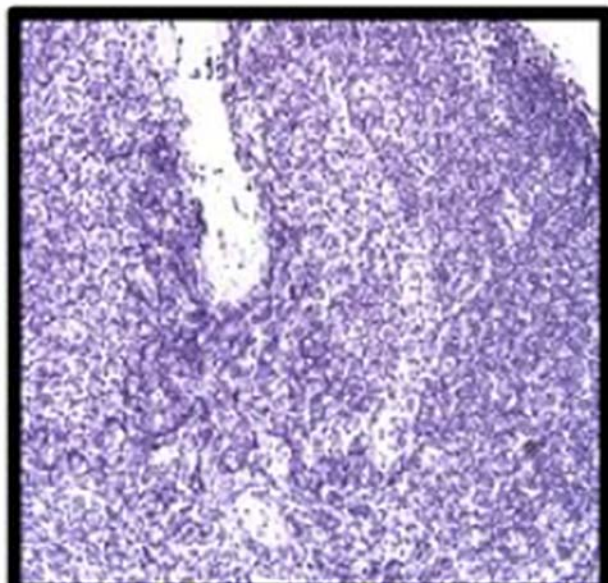

**FDC**

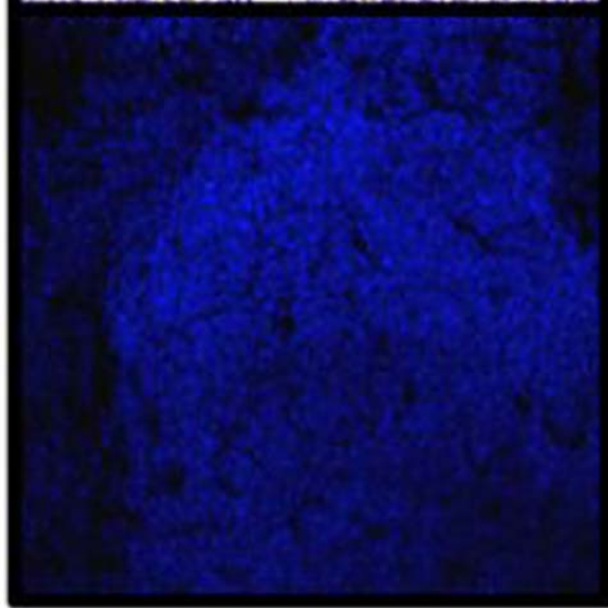

Supplement: NIHMS493864-supplement-supplement_1.pdf [file NIHMS493864-supplement-supplement_1.pdf]
